# Supplementary material
Source: publisher figshare collection journal article supplement (https://gsajournals.figshare.com/ndownloader/files/18018437)
Supplement: Supplementary file 1 [file 18018437]

Cycling conditions for SNP 96°C – 60 seconds – 1 cycle

96°C – 60 seconds

70°C – 45 seconds (annealing) 5 cycles

72°C – 25 seconds

96°C – 25 seconds

65°C – 50 seconds (annealing) 21 cycles

72°C – 30 seconds

96°C – 30 seconds

55°C – 60 seconds (annealing) 4 cycles

72°C – 90 seconds

Cool by ramping to 20°C for 30 seconds
